# Supplementary figures and images for: The Clinical Significance and Potential Molecular Mechanism of Upregulated CDC28 Protein Kinase Regulatory Subunit 1B in Osteosarcoma
Source: Hindawi journal article supplement (doi:10.1155/2021/7228584), 2021-12-10

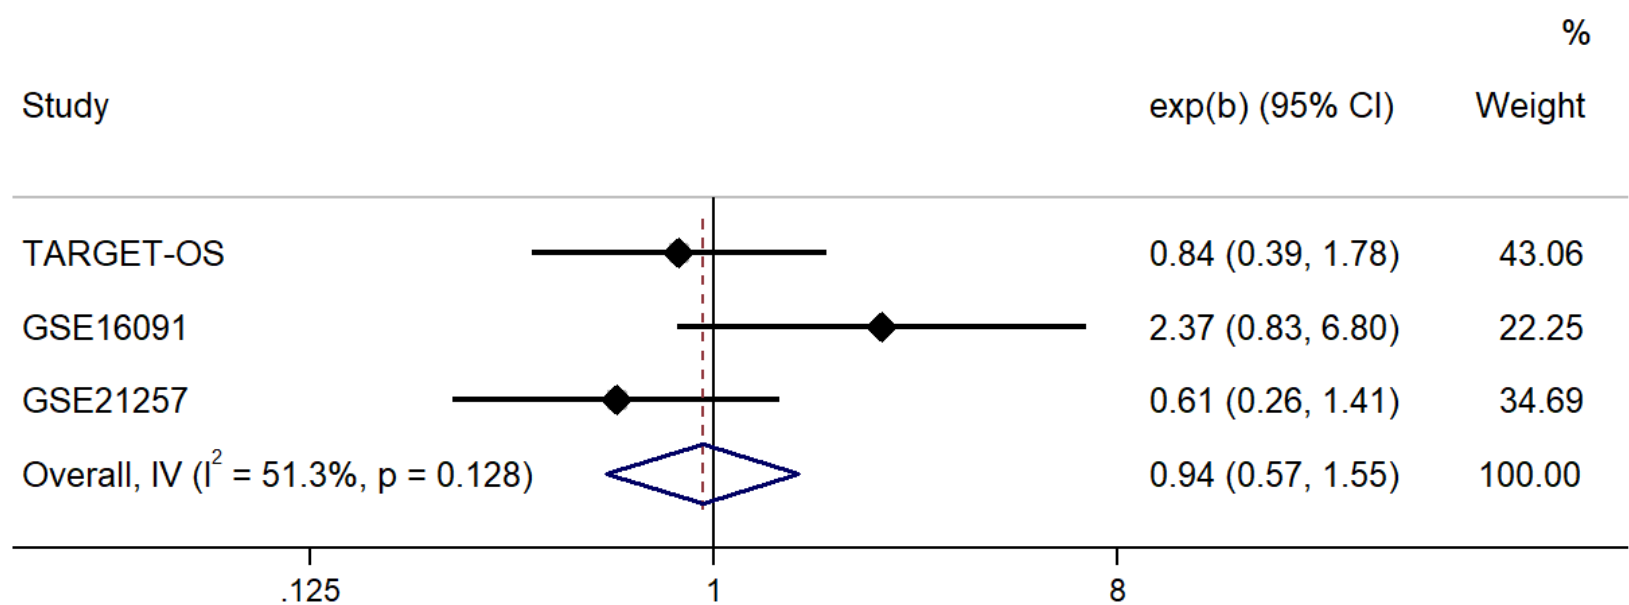

(a)

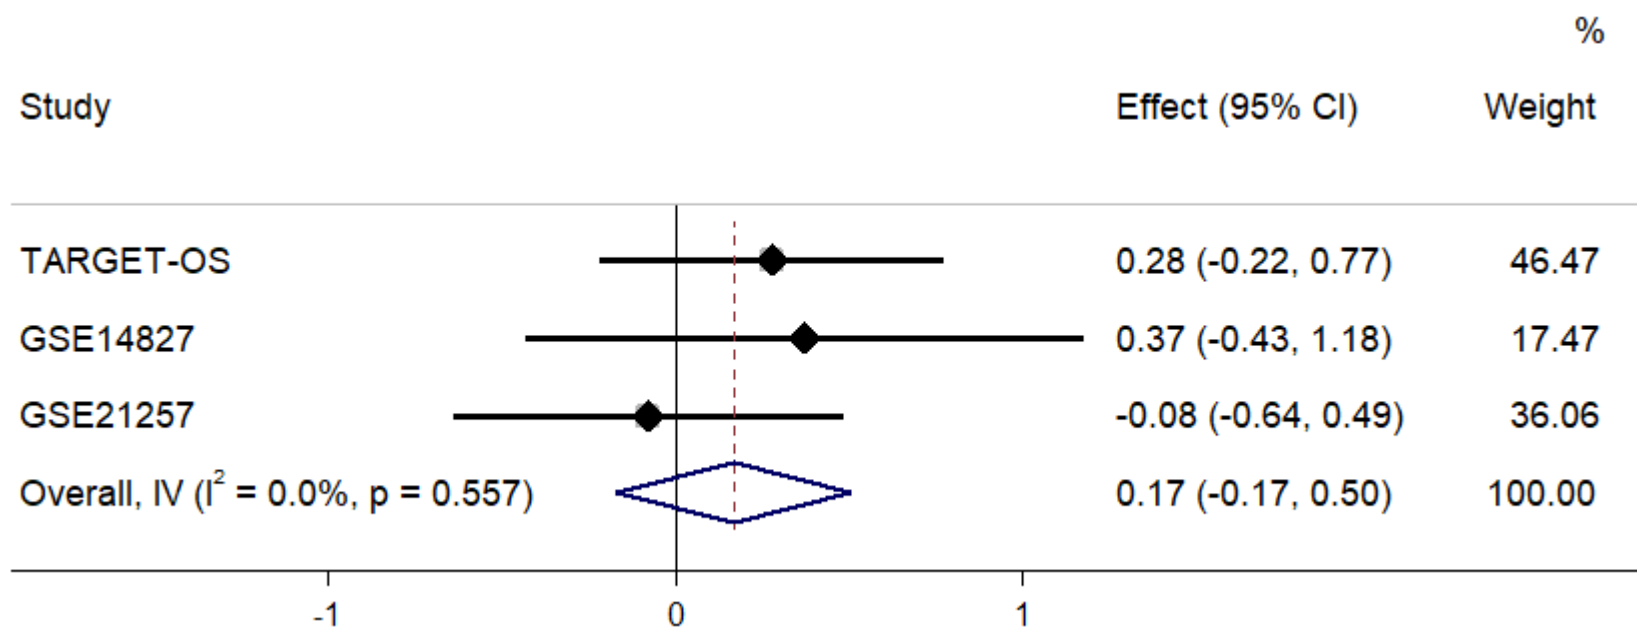

(b)

Supplement: f1 [file 7228584.f1.zip]

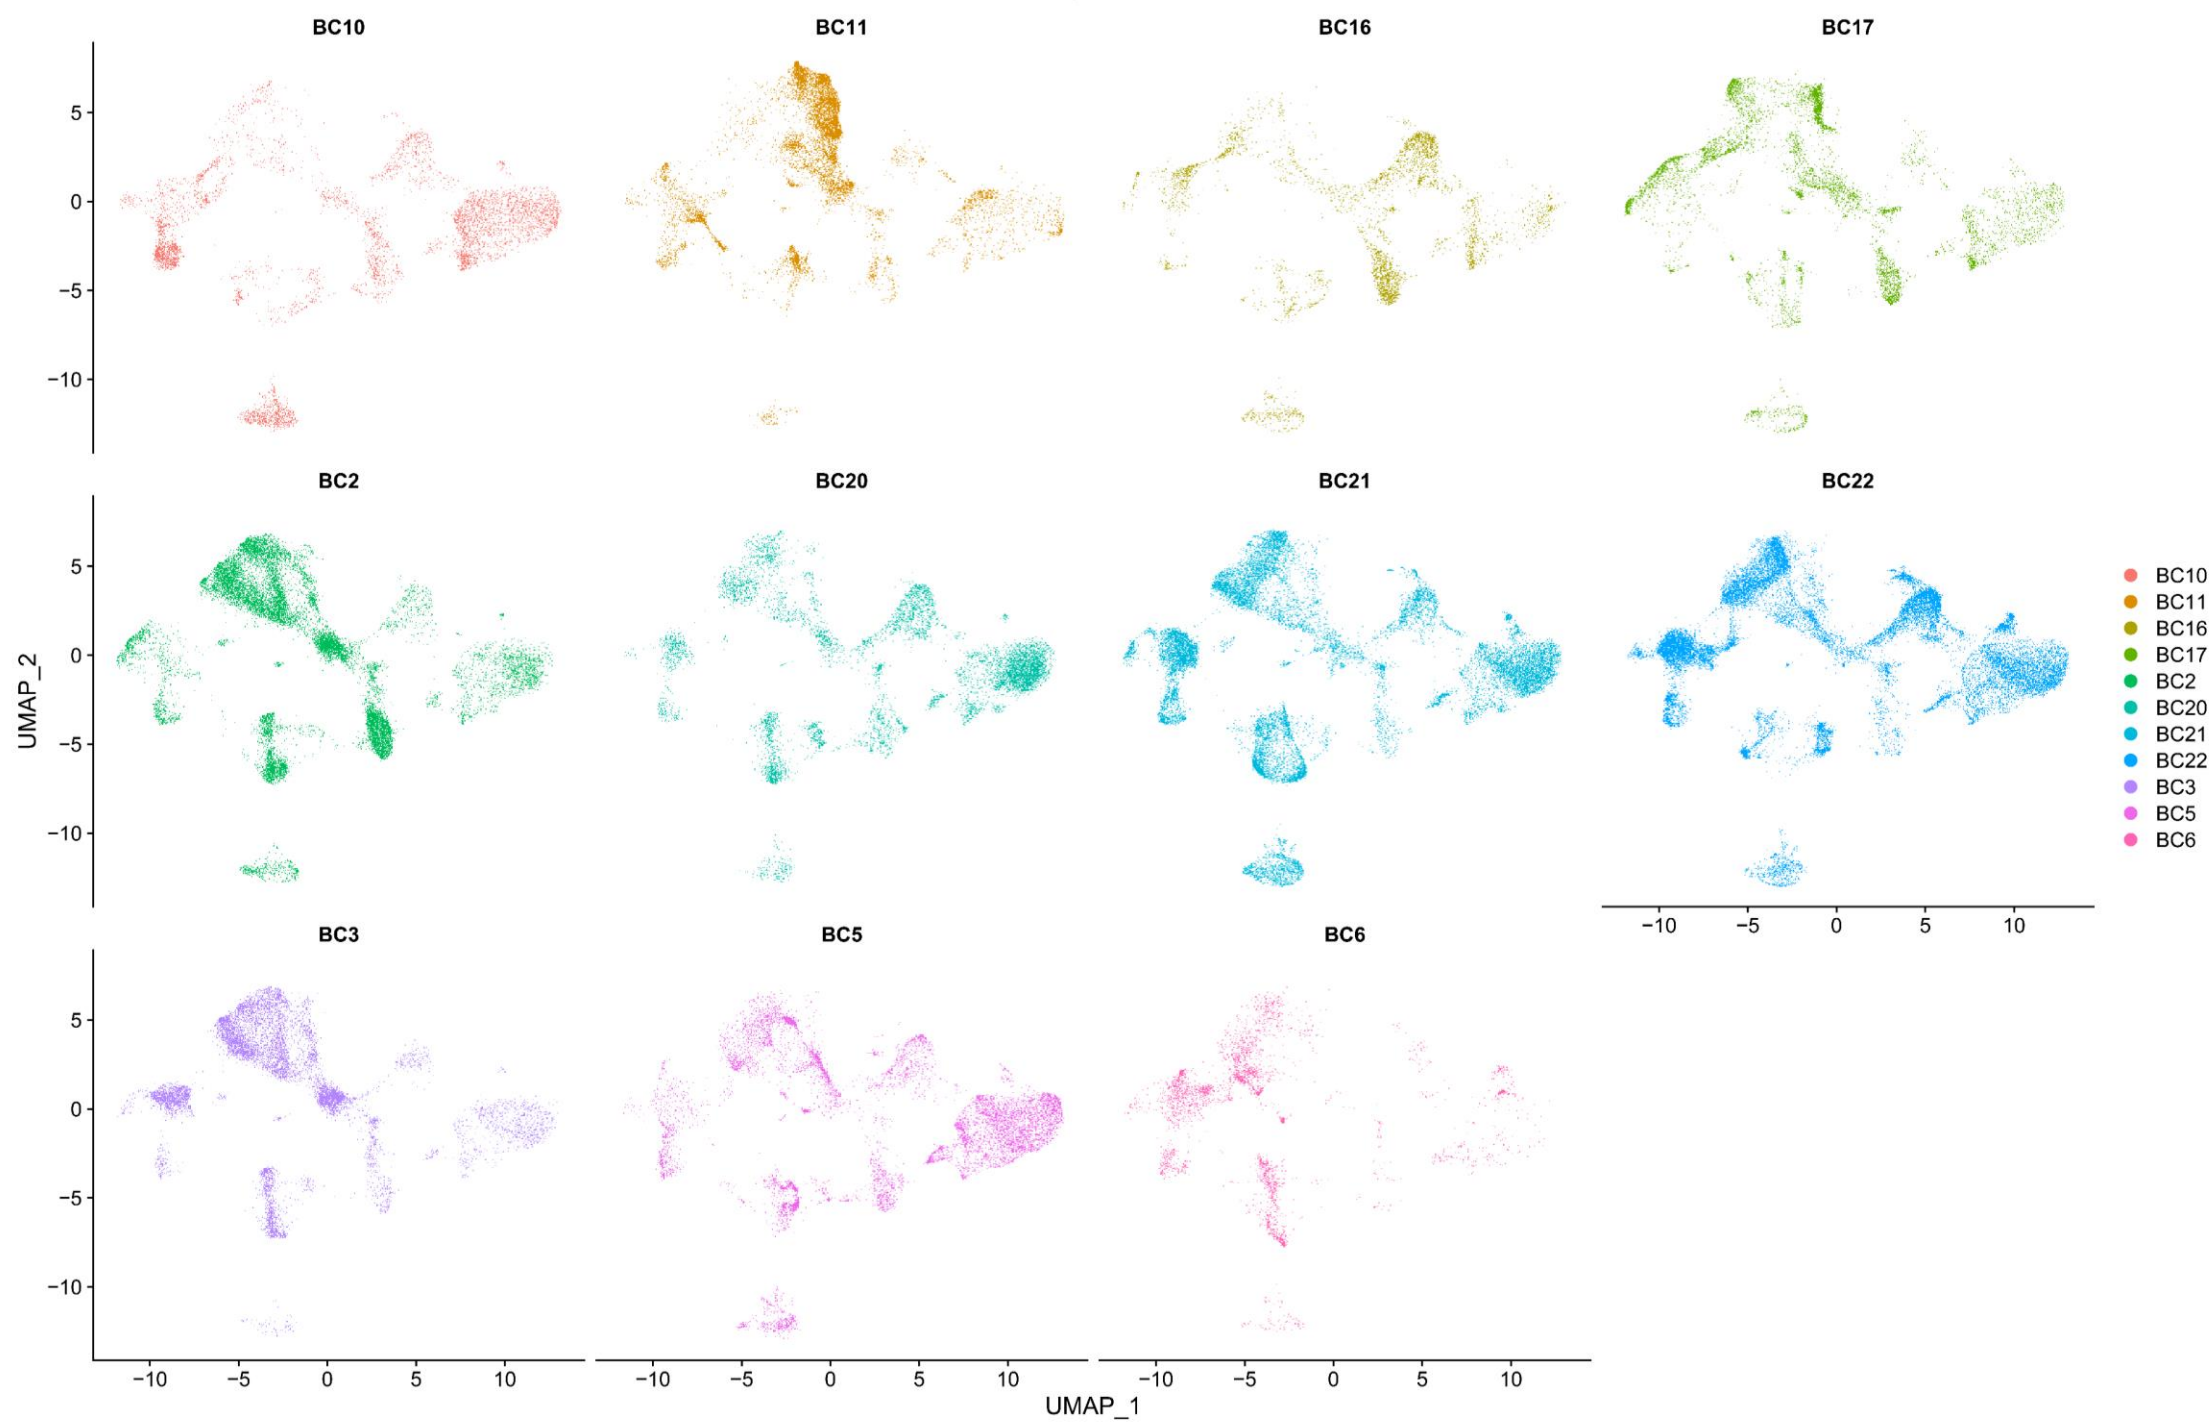

Supplement: f1 [file 7228584.f1.zip]

**Microarray in-house AUC=1.00**

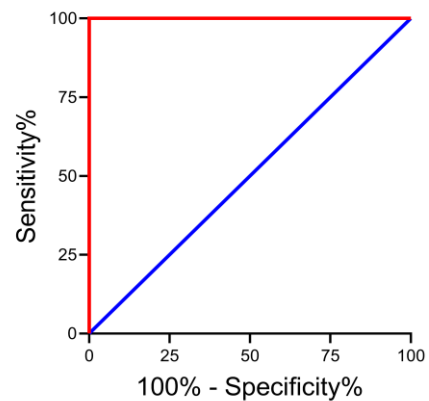

(a)

**E-MEXP-3628 AUC=0.53**

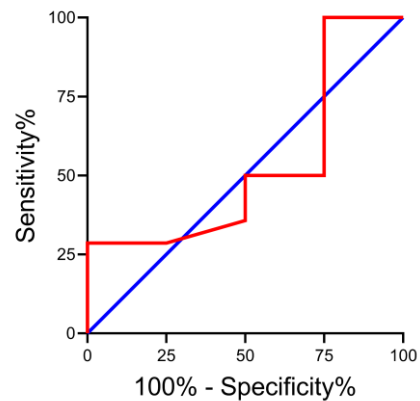

(b)

**GPL6244 AUC=0.57**

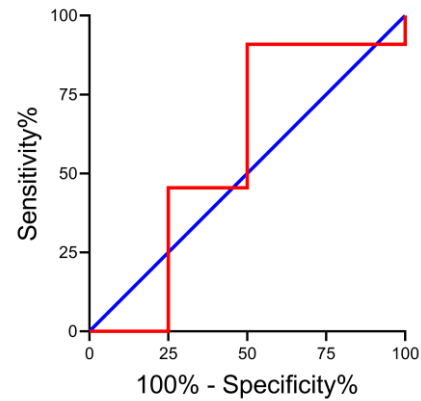

(c)

**GSE19276 AUC=0.73**

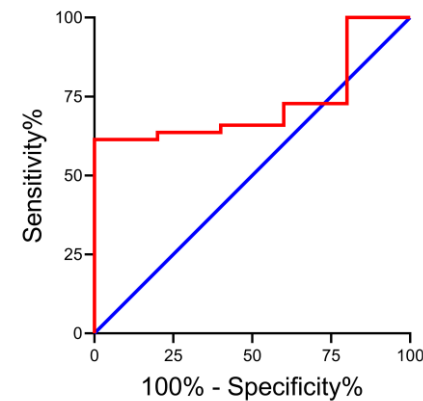

(d)

**GSE36004 AUC=0.71**

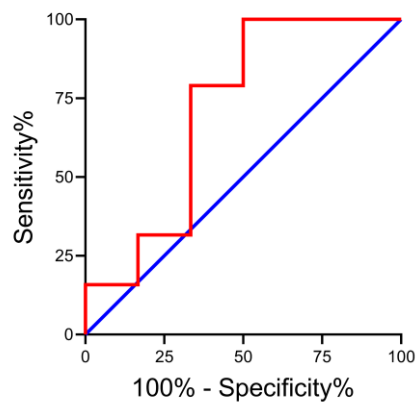

(e)

**GSE42352 AUC=1.00**

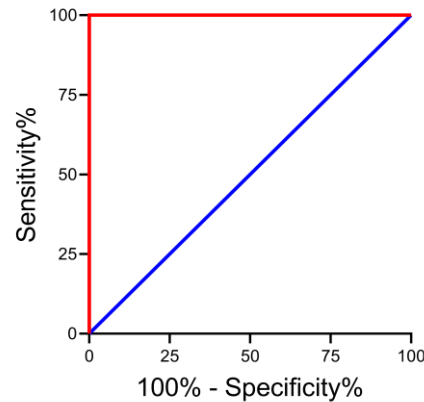

(f)

**GSE42572 AUC=0.51**

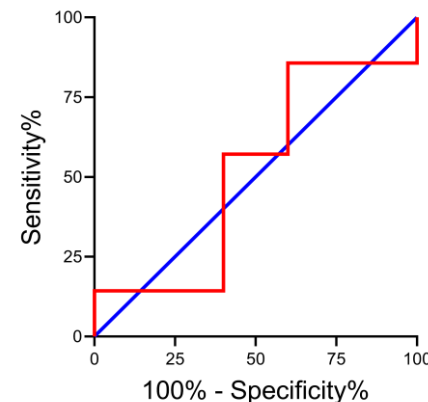

(g)

Supplement: f1 [file 7228584.f1.zip]

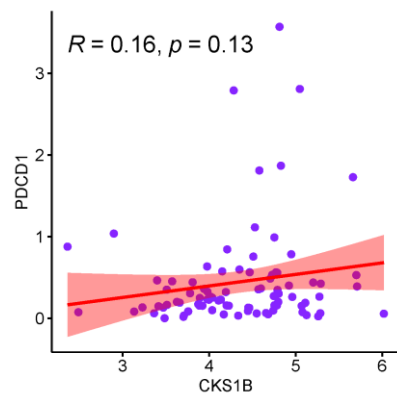

(a)

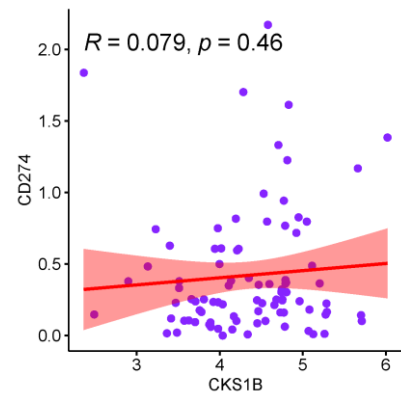

(b)

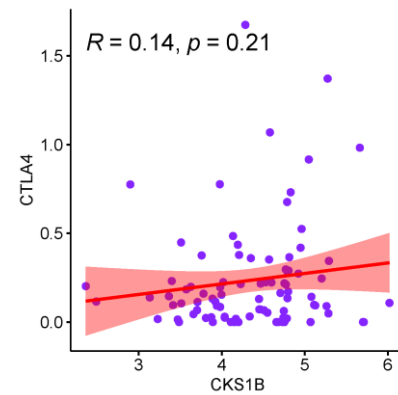

(c)

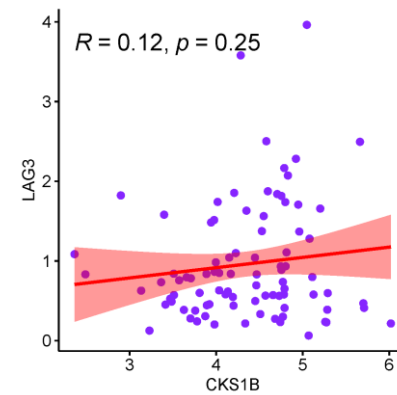

(d)

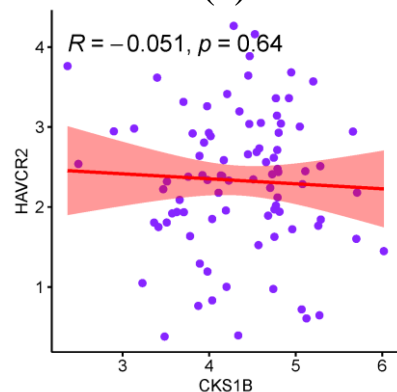

(e)

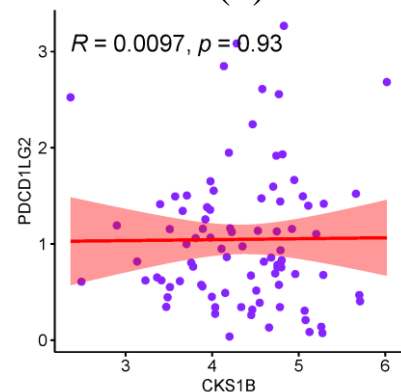

(f)

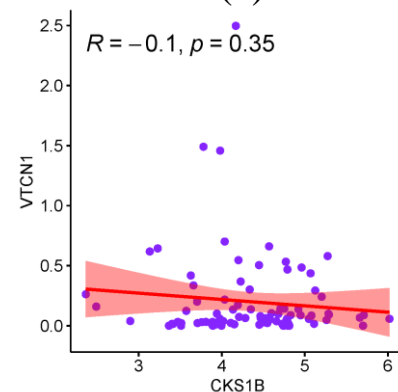

(g)

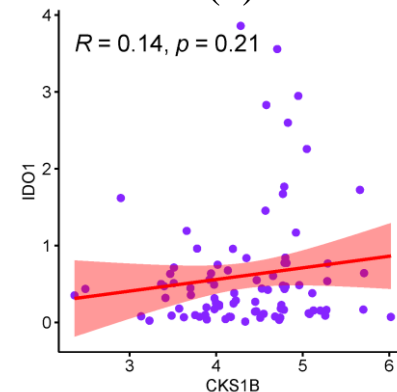

(h)

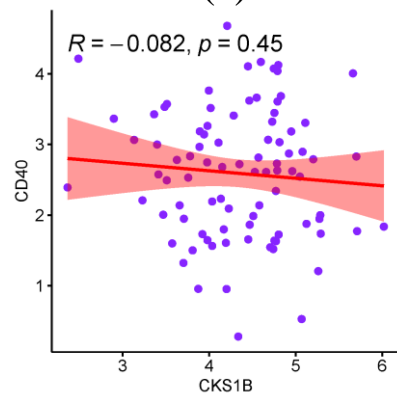

(i)

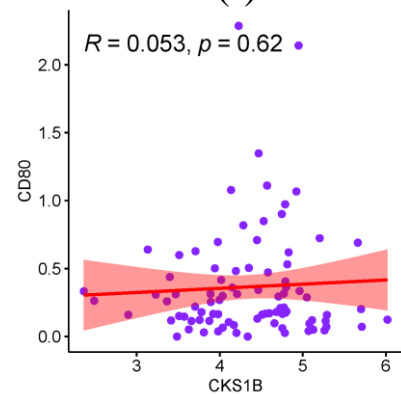

(j)

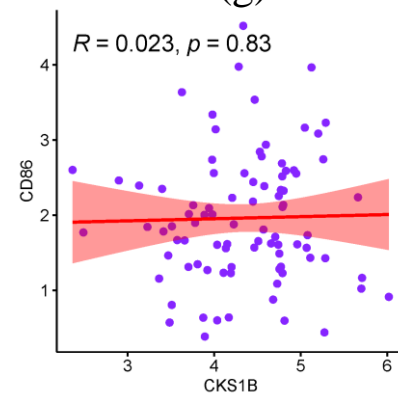

(k)

Supplement: f1 [file 7228584.f1.zip]

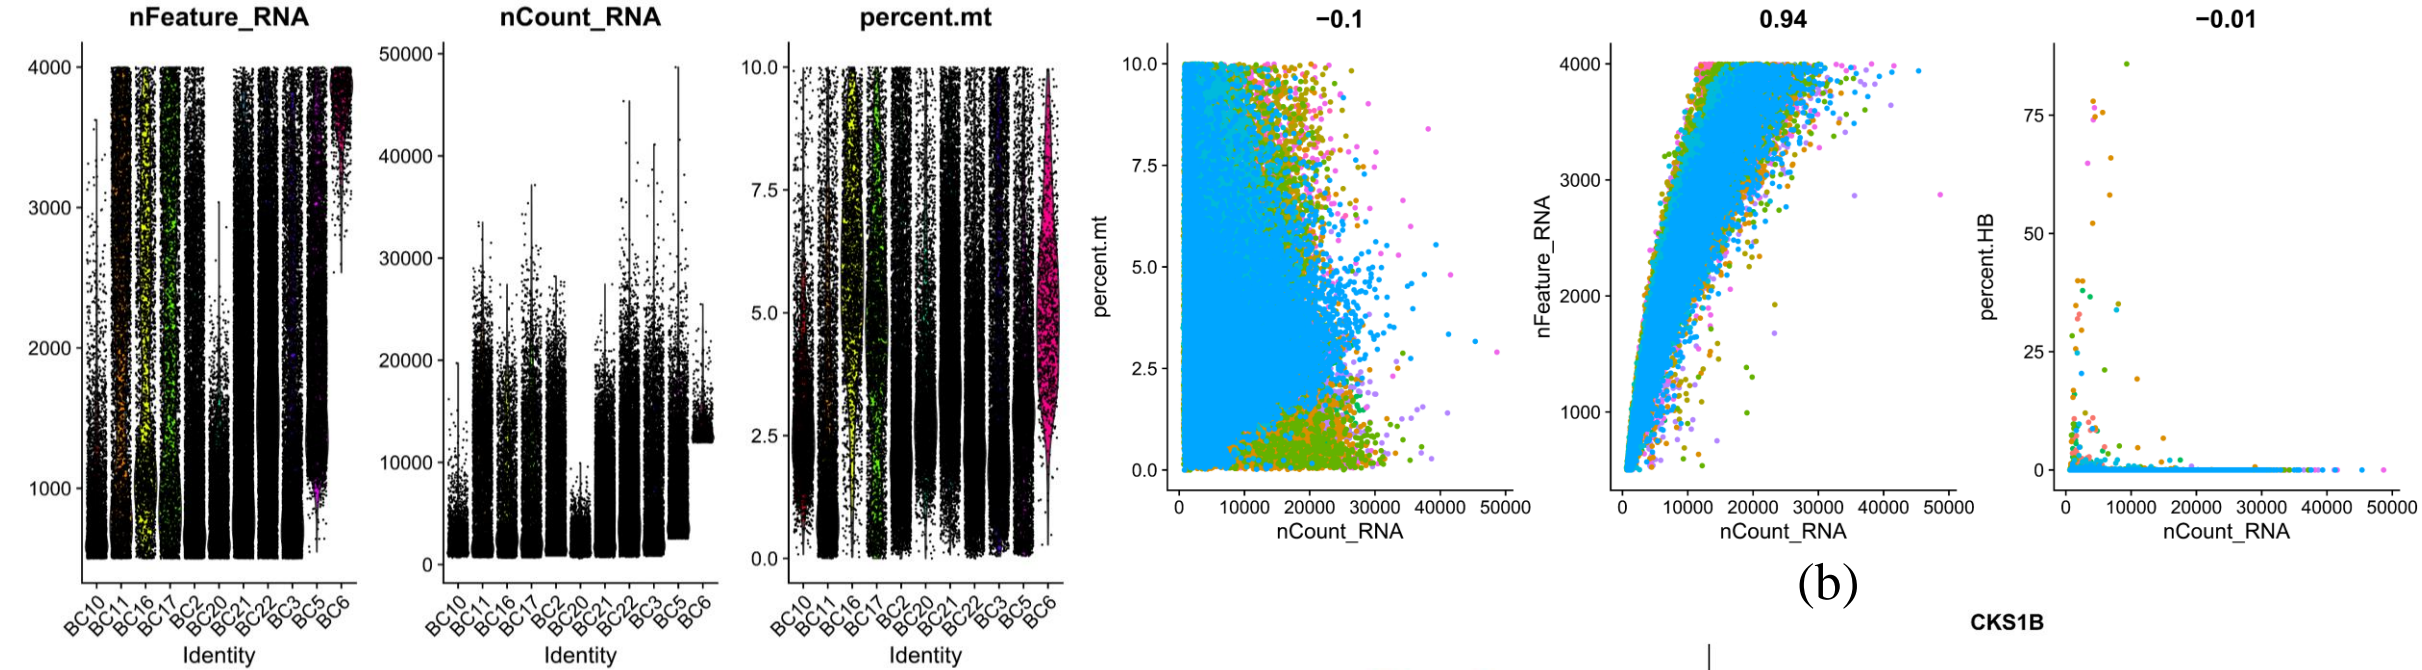

(b)

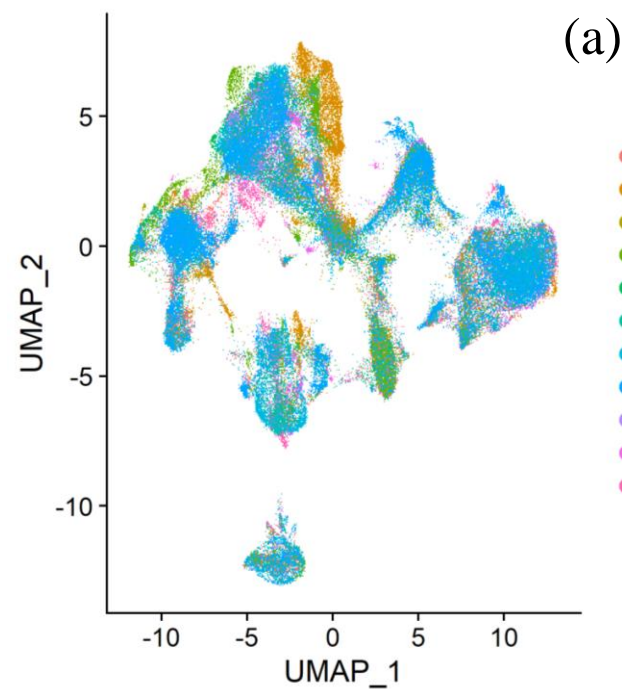

(a)

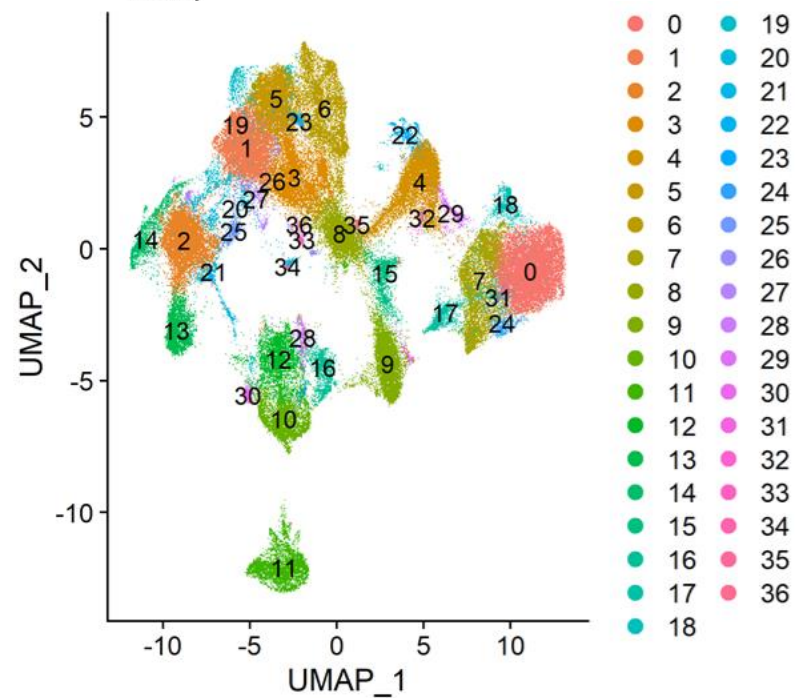

(d)

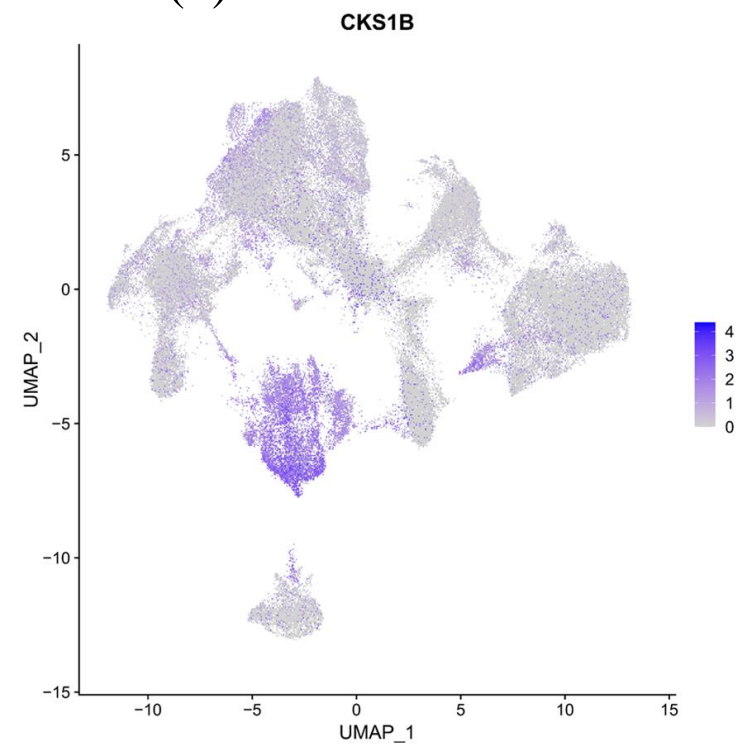

(e)

(c)

Supplement: f1 [file 7228584.f1.zip]

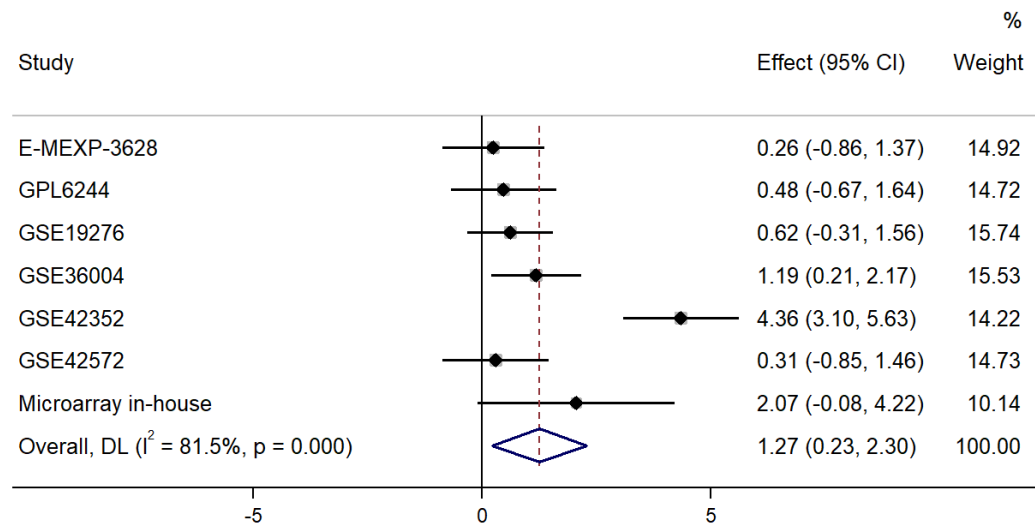

(a)

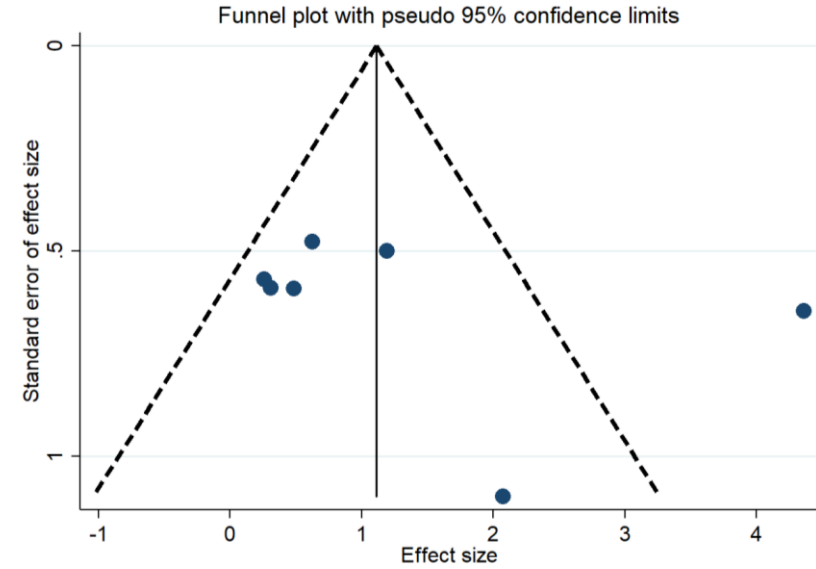

(b)

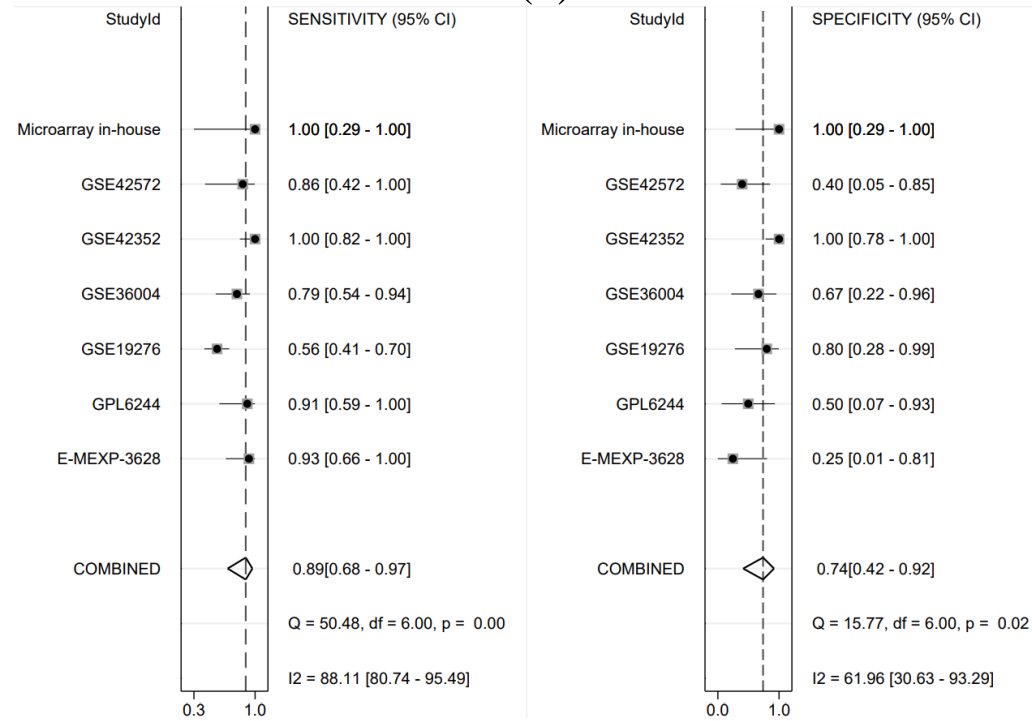

(c)

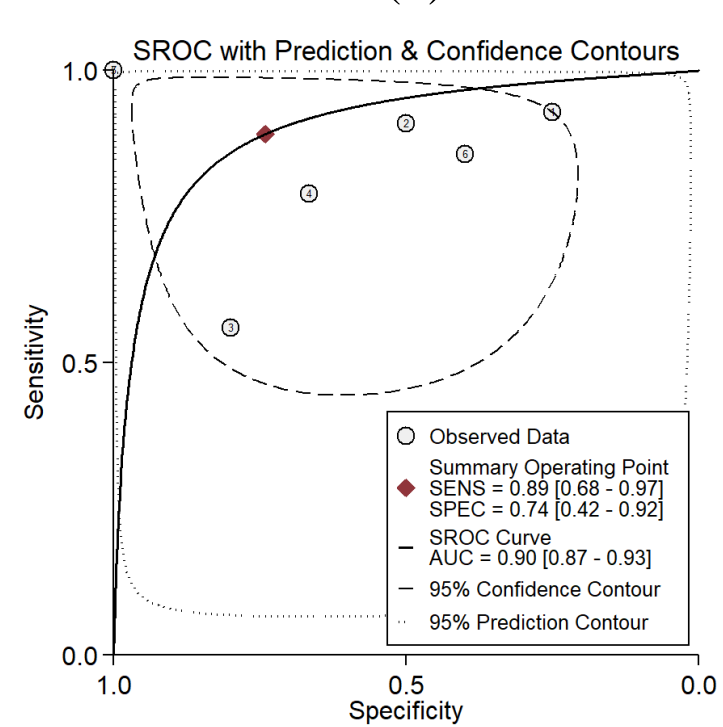

(d)

Supplement: f1 [file 7228584.f1.zip]

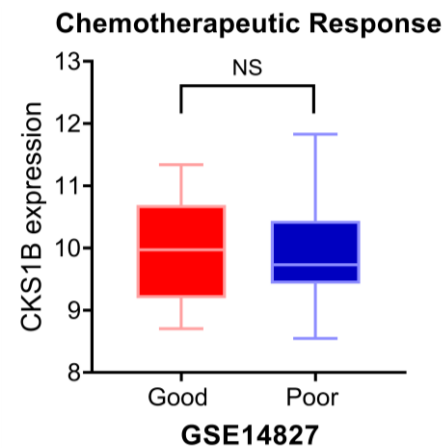

(a)

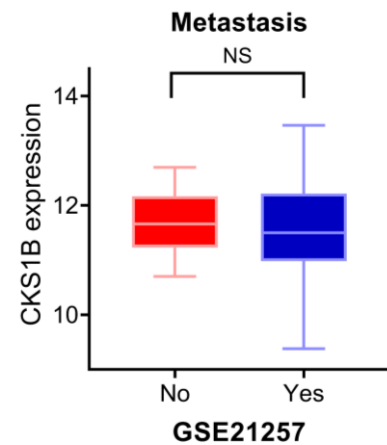

(b)

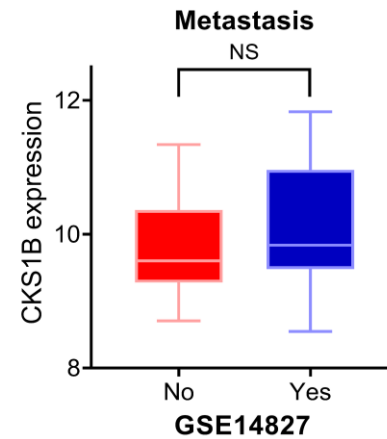

(c)

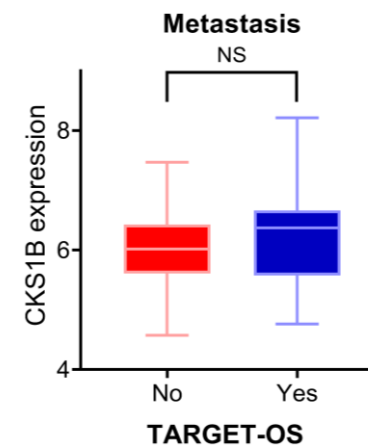

(d)

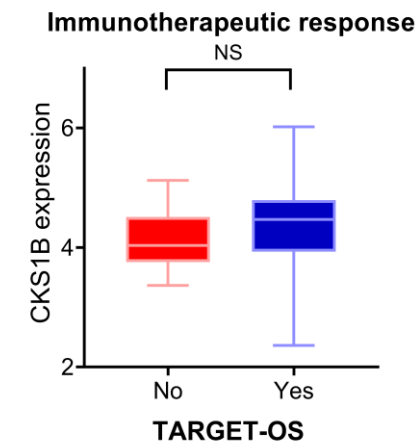

(e)

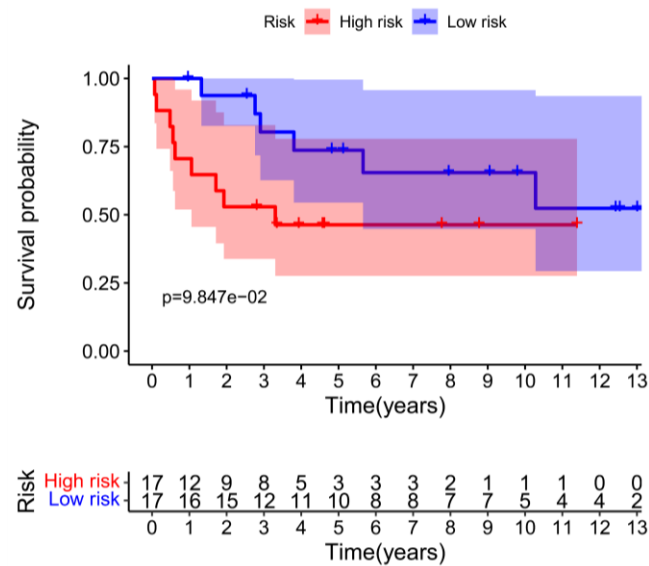

(f)

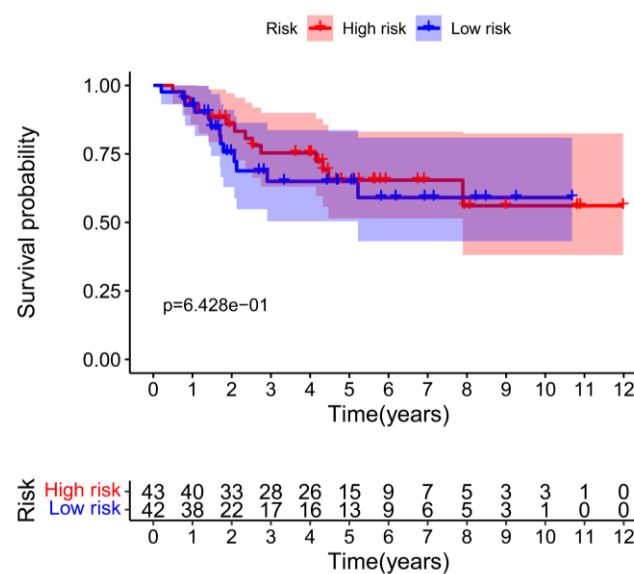

(g)

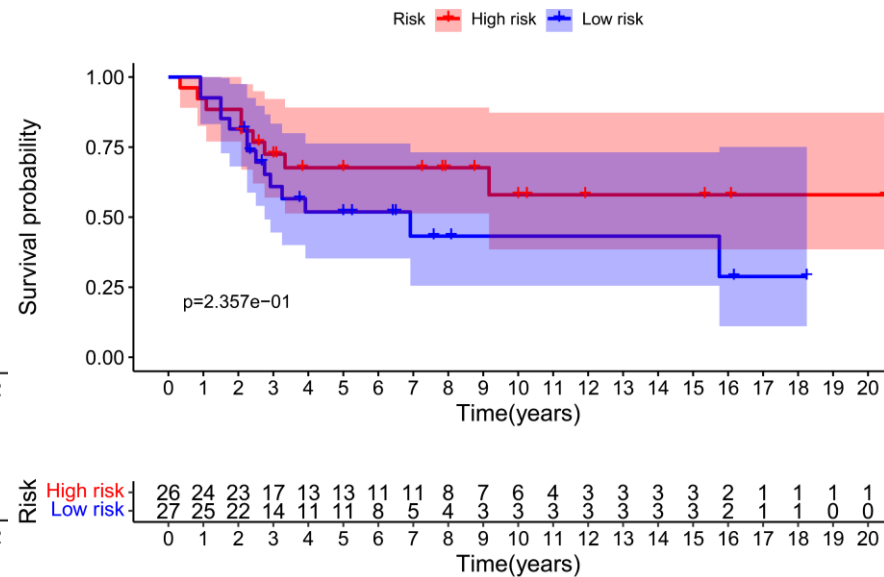

(h)

Supplement: f1 [file 7228584.f1.zip]

**Microarray in-house**

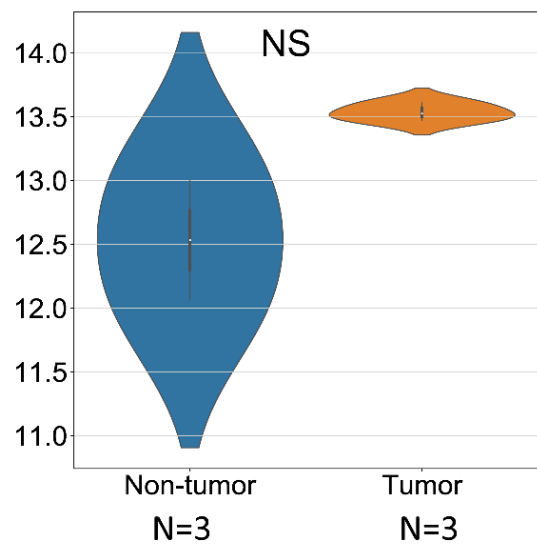

(a)

**E-MXEP-3628**

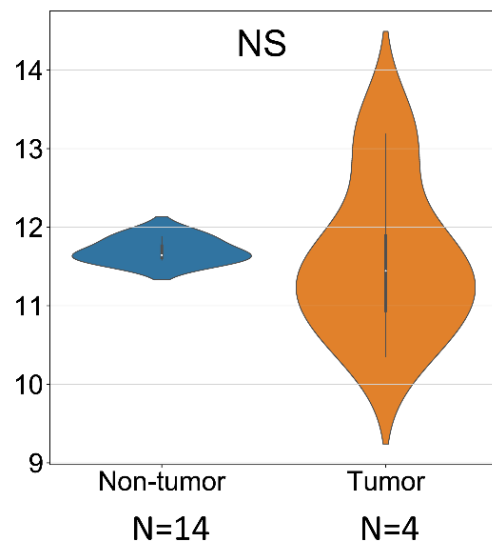

(b)

**GPL6244**

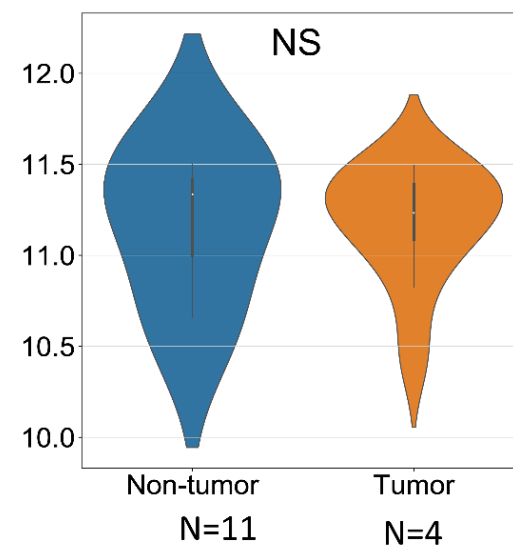

(c)

**GSE19276**

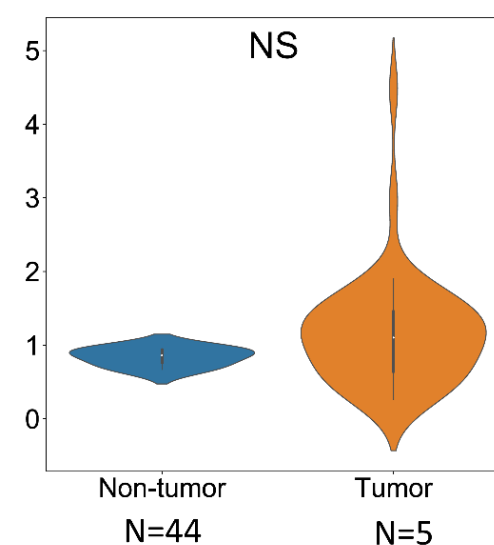

(d)

**GSE36004**

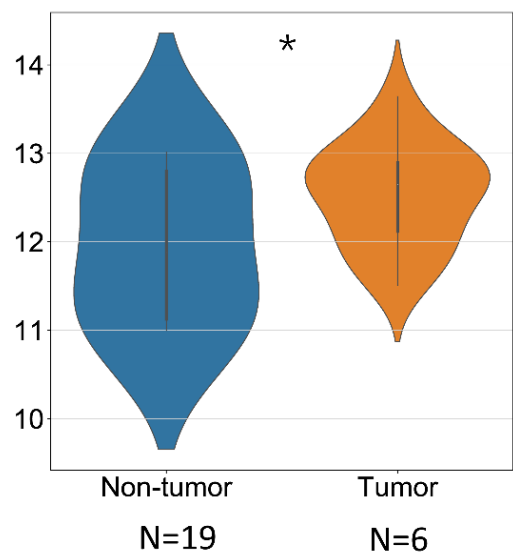

(e)

**GSE42352**

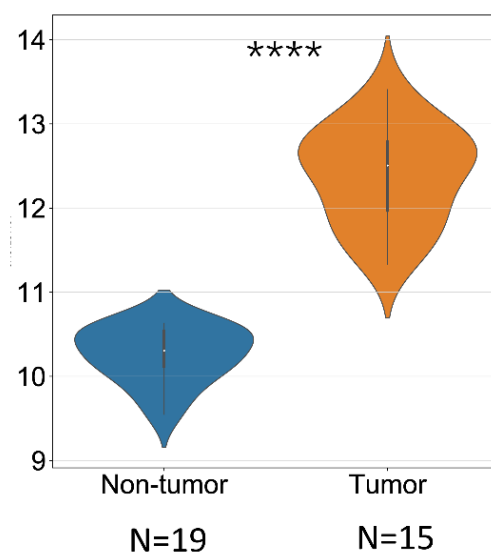

(f)

**GSE42572**

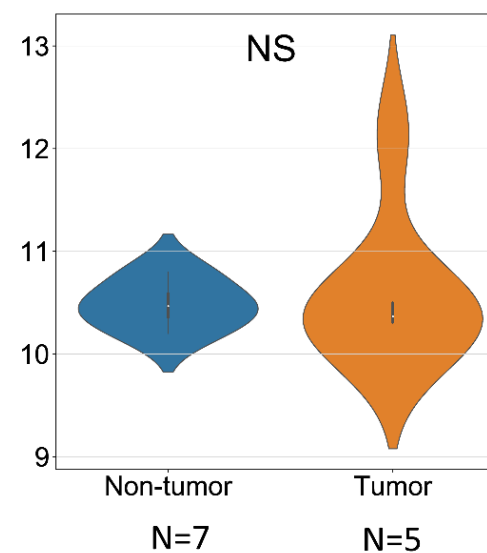

(g)

Supplement: f1 [file 7228584.f1.zip]

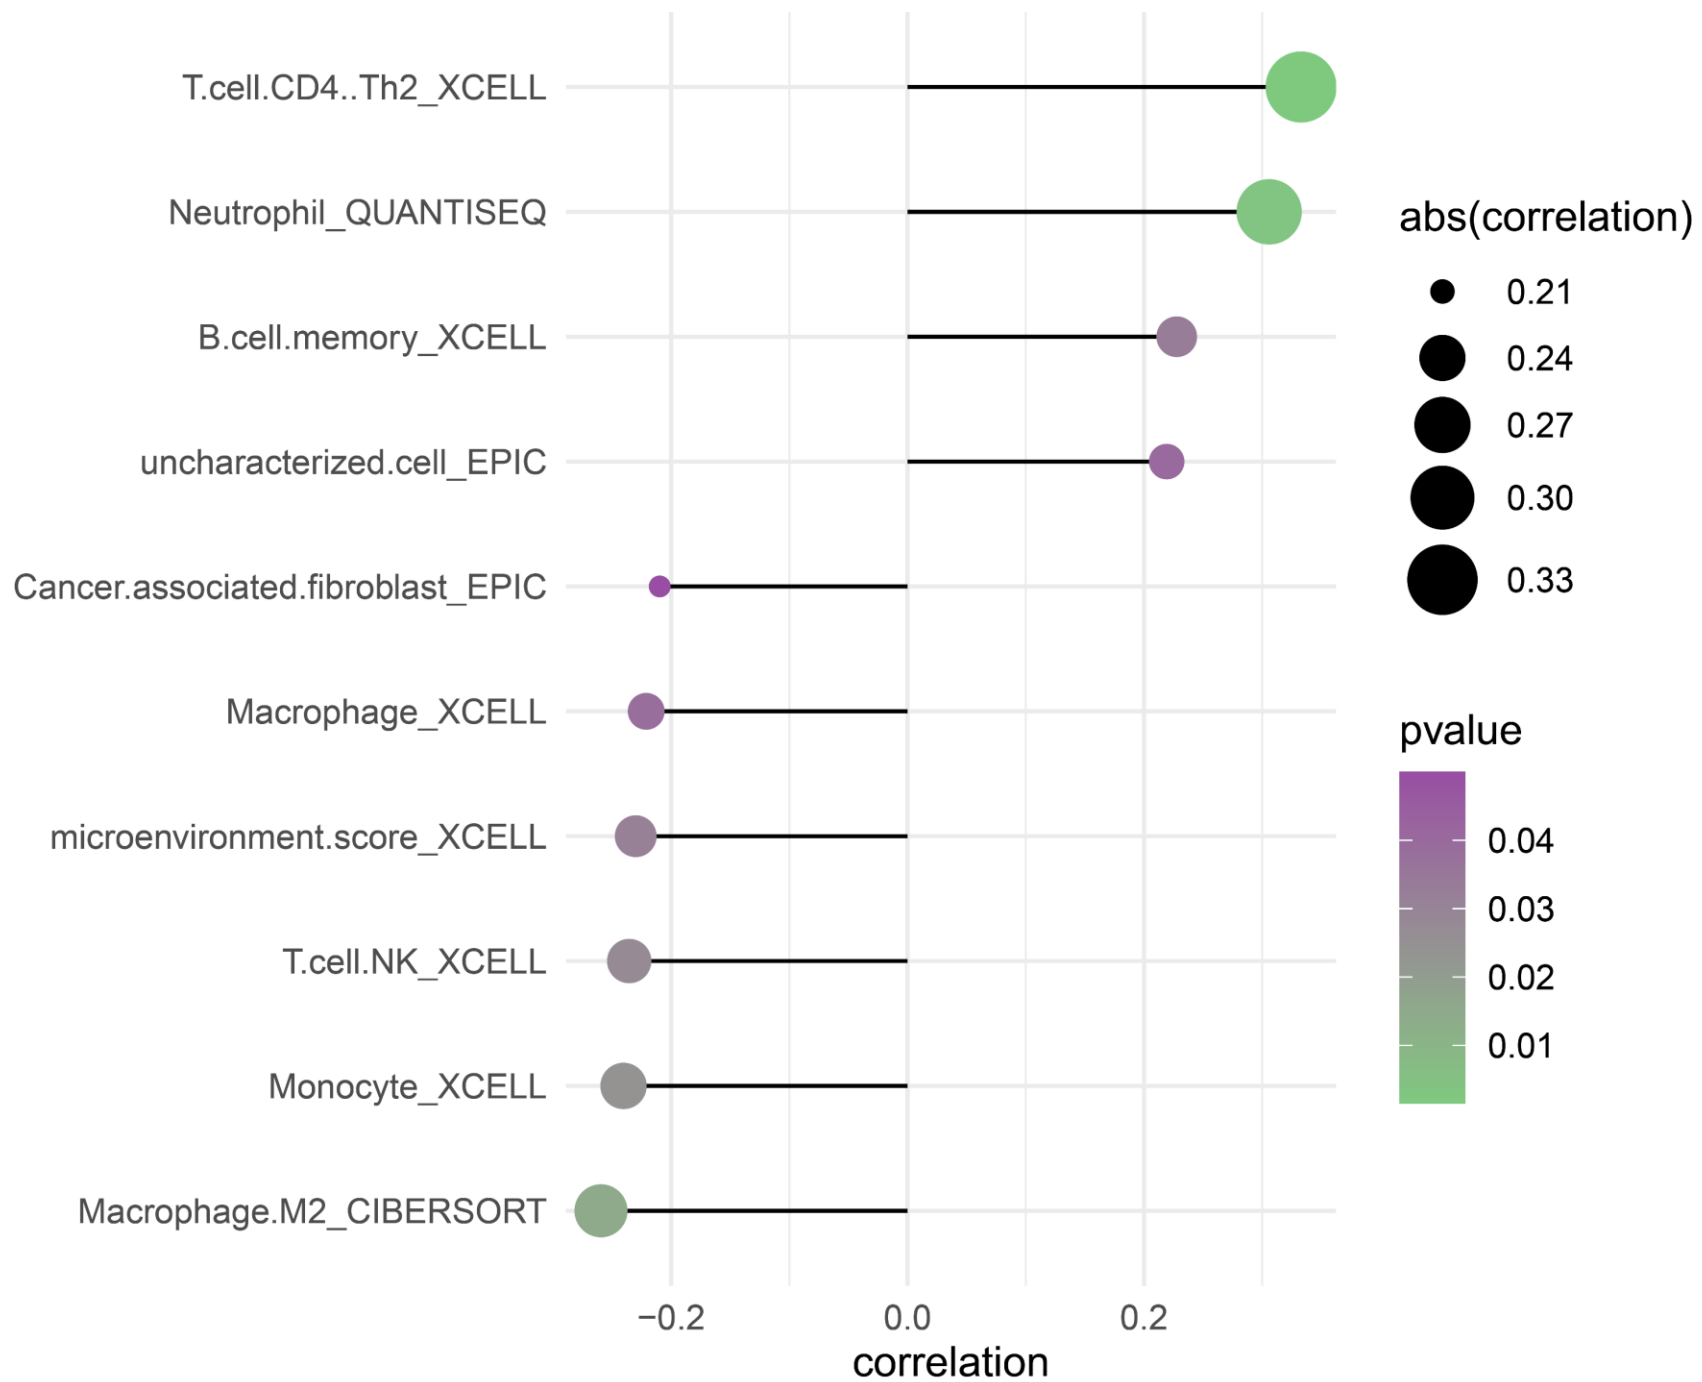

Supplement: f1 [file 7228584.f1.zip]
